# Supplementary material
Source: PubMed Central journal article supplement (PMC8055144)
Supplement: NIHMS1677912-supplement-12.pdf [file NIHMS1677912-supplement-12.pdf]

**Table S3. List of oligonucleotide primers used for this work, related to Figures 4, 5, 6, and 7.**

| Description                | Sequence (5' to 3')                                                                 |
|----------------------------|-------------------------------------------------------------------------------------|
| stat6 sgRNA target oligo   | taatacgactcactataGGGATGCCGTTGGTAGGTGGgttttagagctagaa                                |
| cmyb sgRNA target oligo    | taatacgactcactataGGAAGTACGGCCCCAAACGTgttttagagctagaa                                |
| IL4R sgRNA target oligo #1 | taatacgactcactataGGGCTTGGCAGACGAGTGTGgttttaga<br>gctagaaatagc                       |
| IL4R sgRNA target oligo #2 | taatacgactcactataGGTGATCGGATGTCTTGACGgttttaga<br>gctagaaatagc                       |
| IL4R sgRNA target oligo #3 | taatacgactcactataGGGAACTTTCATGTTACCTgttttaga<br>gctagaaatagc                        |
| IL4R sgRNA target oligo #4 | taatacgactcactataGGCCAGGCCGTCTGTGATTCgttttaga<br>gctagaaatagc                       |
| stat6 5' genotyping primer | TATGCAGTCCCTCCCTTCG                                                                 |
| stat6 3' genotyping primer | AGCTGATGAAGTGTTTGGCG                                                                |
| cmyb 5' genotyping primer  | GGTTTCAGGTGATTGAGTTGGTG                                                             |
| cmyb 3' genotyping primer  | CTGCTTCCGATTCGCC                                                                    |
| sgRNA tail oligo           | AAAAGCACCGACTCGGTGCCACTTTTTCAAGTTGATAAC<br>GGACTAGCCTTATTTAACTTGCTATTTCTAGCTCTAAAAC |
