# Supplementary material
Source: PubMed Central journal article supplement (PMC8055144)

stat6<sup>+/53/xt53</sup>

Phase contrast

*M. marinum*

DAPI

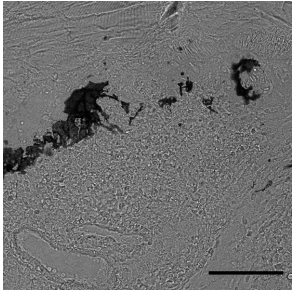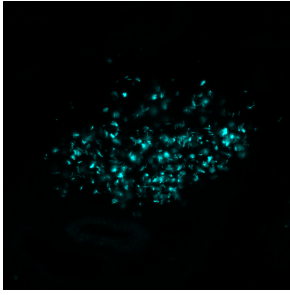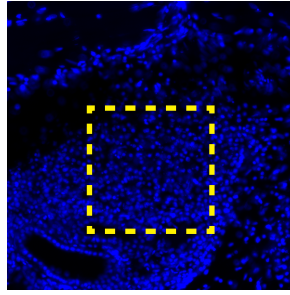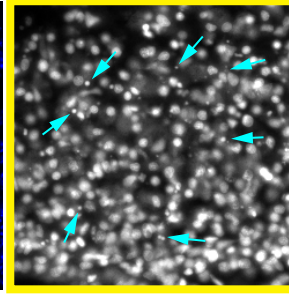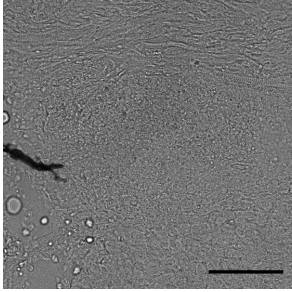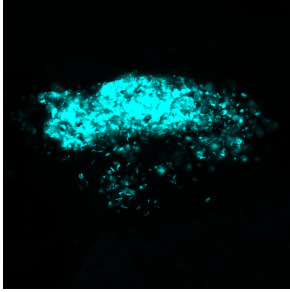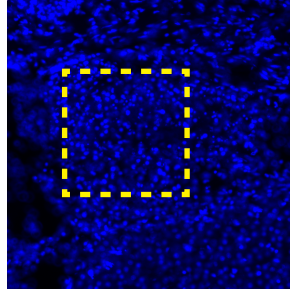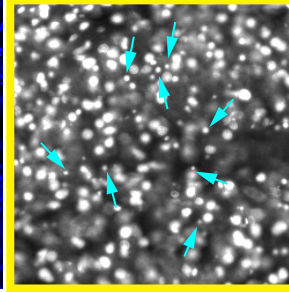

Supplement: NIHMS1677912-supplement-4.pdf [file NIHMS1677912-supplement-4.pdf]
